# Supplementary material for: The protective roles of eugenol on type 1 diabetes mellitus through NRF2-mediated oxidative stress pathway
Source: eLife journal article supplement (doi:10.7554/elife.96600), 2024-05-29

Full unedited gel for Figure 7A. The red box shows the image used in the manuscript.

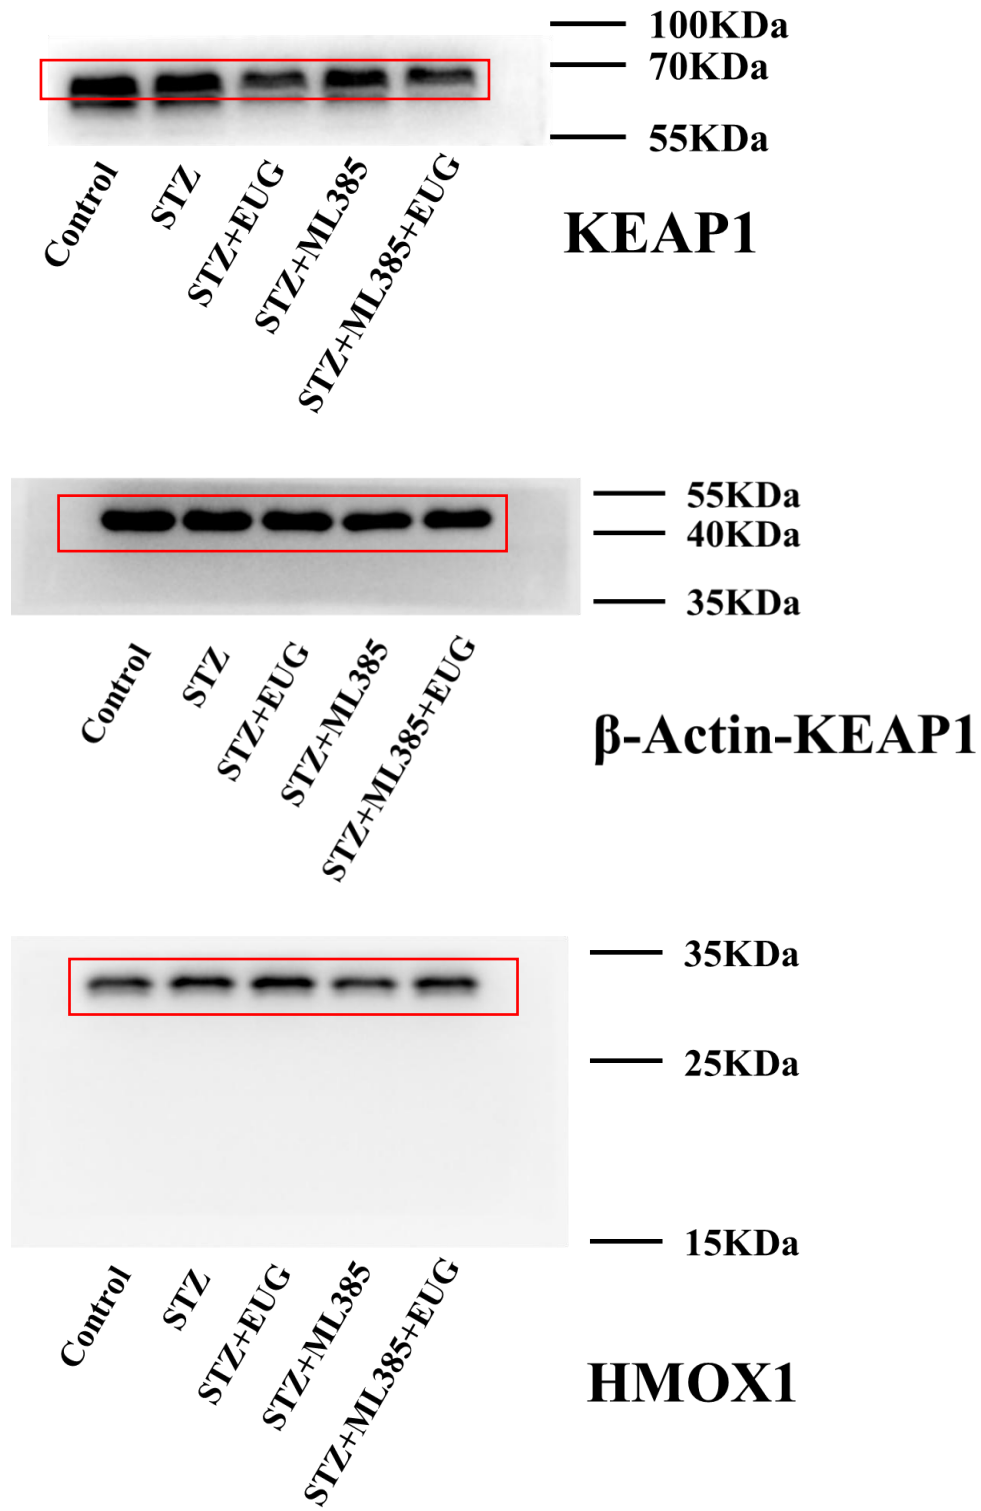

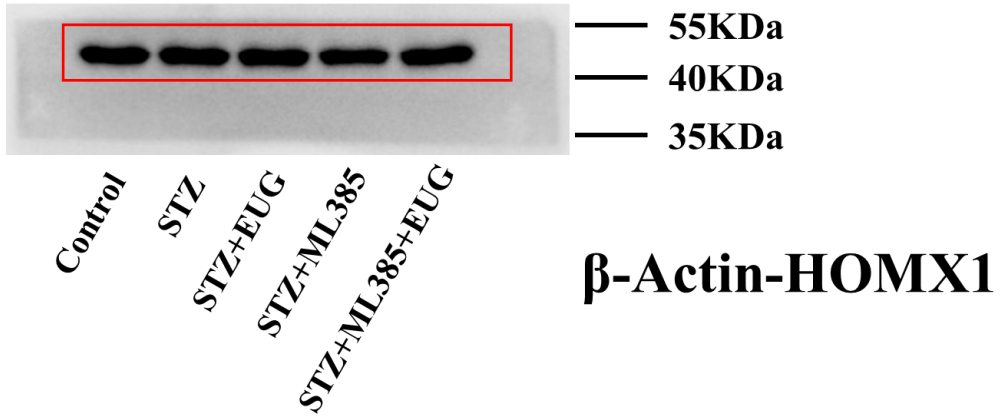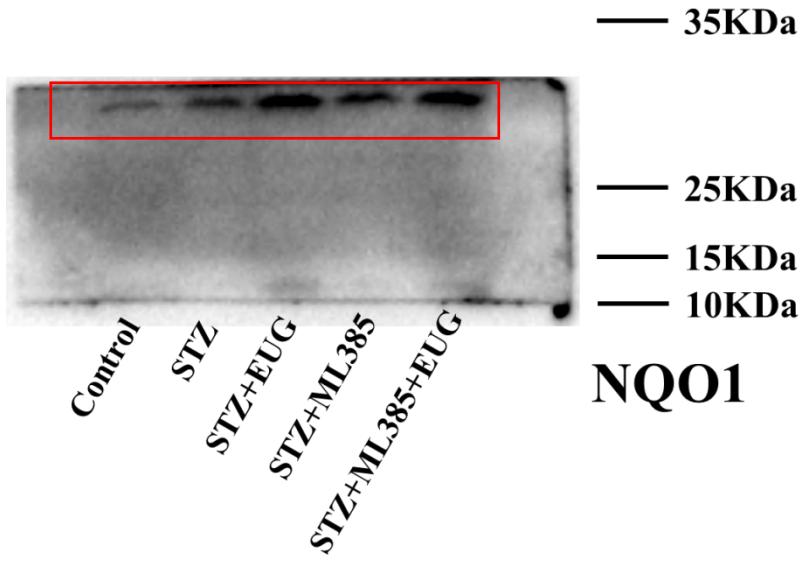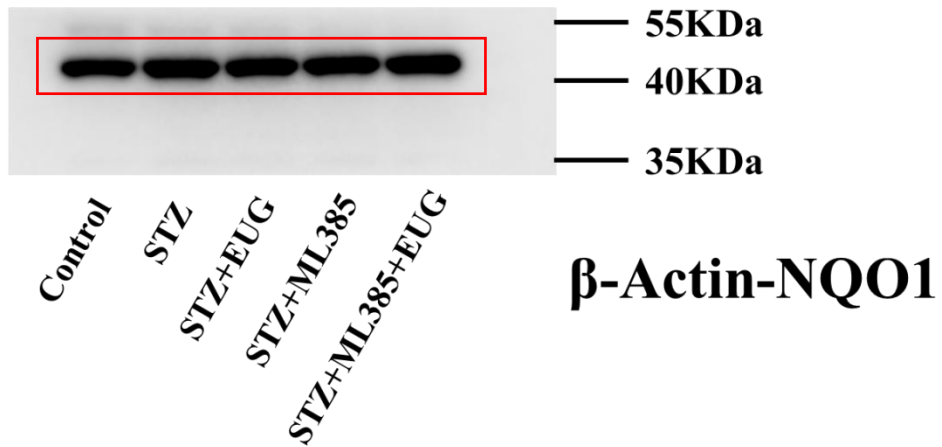

Supplement: fig7-data1 [file elife-96600-fig7-data1-v1.pdf]
