# Supplementary material for: The protective roles of eugenol on type 1 diabetes mellitus through NRF2-mediated oxidative stress pathway
Source: eLife journal article supplement (doi:10.7554/elife.96600), 2024-05-29
Supplement: fig9-data1 [file elife-96600-fig9-data1-v1.pdf]

Full unedited gel for Figure 9A. The red box shows the image used in the manuscript.

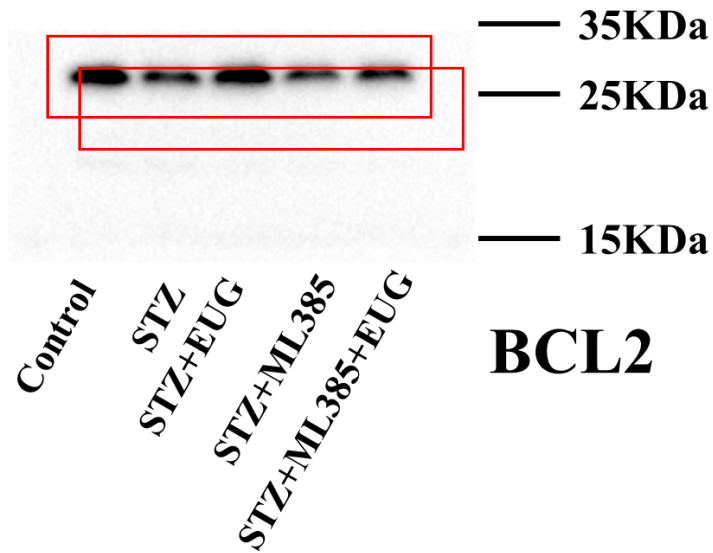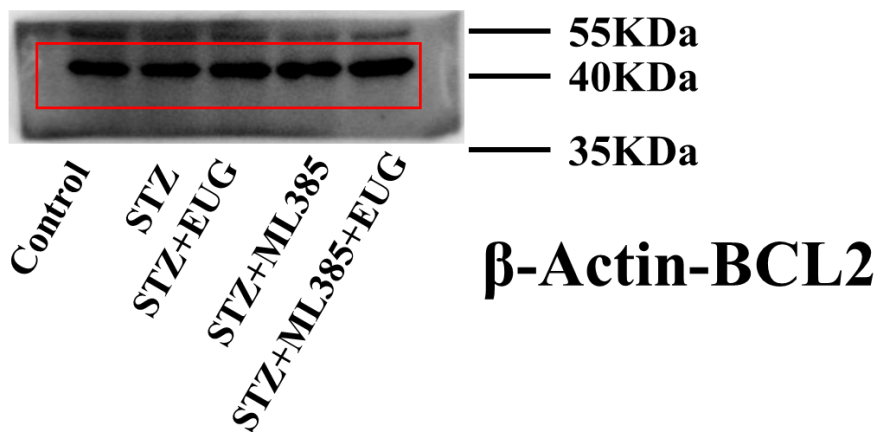

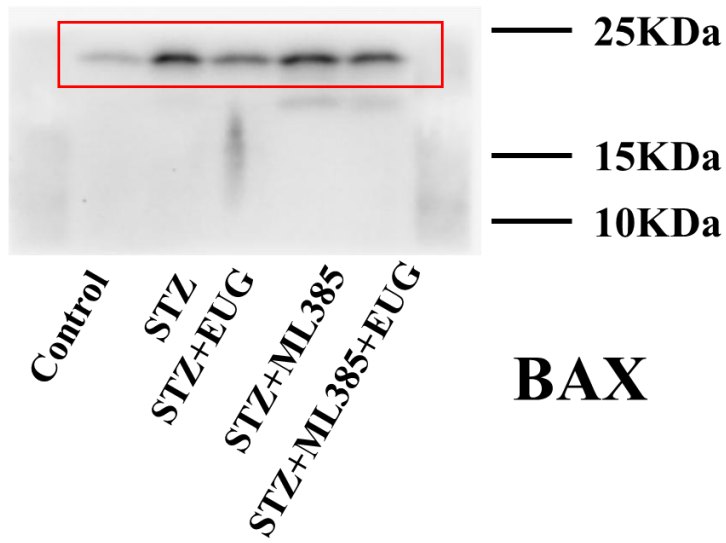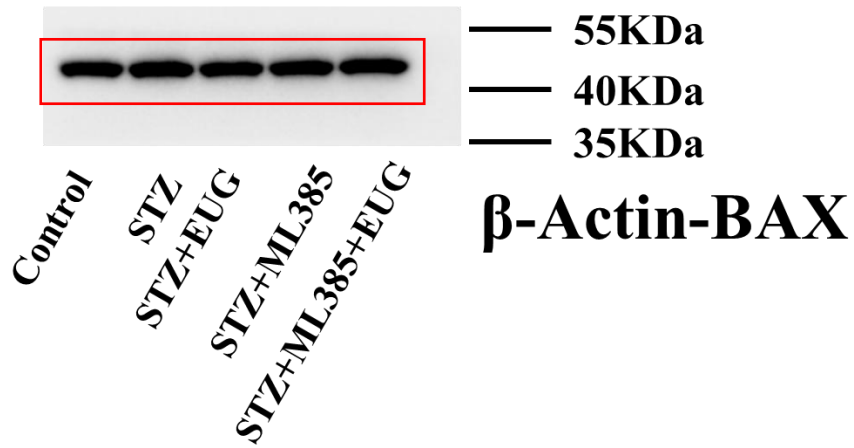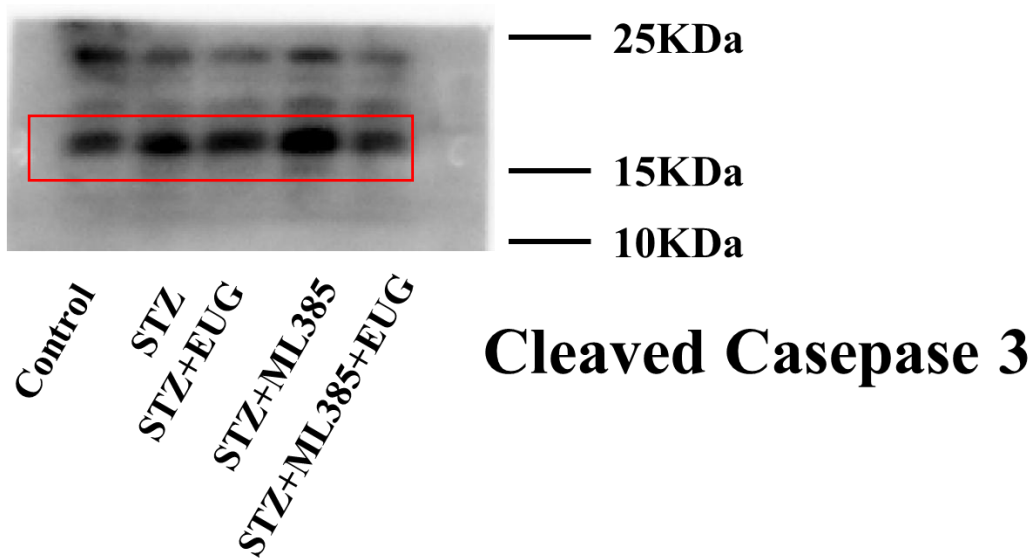

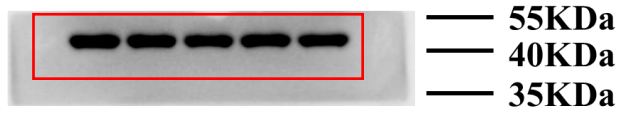

Control  
STZ  
STZ+EUG  
STZ+ML385  
STZ+ML385+EUG

**$\beta$ -Actin-Cleaved Casepase 3**
