# Supplementary material for: The protective roles of eugenol on type 1 diabetes mellitus through NRF2-mediated oxidative stress pathway
Source: eLife. 2025 Jan 10;13:RP96600. doi: 10.7554/eLife.96600 (PMC11723580; doi:10.7554/eLife.96600)
Supplement: Supplementary file 1. — ND = not detected; WB = western blot; IHC: immunohistochemistry; IF: immunofluorescence. [file elife-96600-supp1.docx]

**Supplementary File 1. Antibodies**

| **Antibody** | **Species** | **Company (catalogue)** | **Dilution** | |
| --- | --- | --- | --- | --- |
| **WB** | **IHC/IF** |
| Insulin | Rabbit | Abcam (ab181547) | 1: 1000 | 1: 200 |
| γH2AX | Rabbit | Abmart (T56572) | 1: 5000 | 1: 100 |
| BCL2 | Mouse | Affinity Biosciences (BF9103) | 1: 1000 | ND |
| BAX | Mouse | [Santa Cruz Biotechnology](http://www.baidu.com/link?url=JyKcE01MHDo2C82_vA7PLGsOo6FHhidzFLsl0vS1U__) (sc-7480) | 1: 500 | ND |
| Cleaved Caspase-3 | Rabbit | Cell Signaling Technology (#9664) | 1: 1000 | ND |
| NRF2 | Rabbit | Proteintech (16396-1-AP) | 1: 1000 | 1: 200 |
| KEAP1 | Mouse | Proteintech (60027-1-Ig) | 1: 1000 | ND |
| HMOX1 | Rabbit | Proteintech (10701-1-AP) | 1: 1000 | 1: 200 |
| NQO1 | Mouse | Proteintech (67240-1-Ig) | 1: 1000 | ND |
| β-actin | Rabbit | Proteintech (20536-1-AP) | 1: 5000 | ND |
| Lamin B | Rabbit | Proteintech (12987-1-AP) | 1: 1000 | ND |
| GAPDH | Rabbit | Affinity Biosciences (AF7021) | 1: 5000 | ND |

ND = Not detected; WB = Western blot; IHC: Immunohistochemistry; IF:Immunofluorescence.
